# Supplementary material for: Fabrication of Highly Photostable Polystyrene Films Embedded with Organometallic Complexes
Source: MDPI journal article supplement (doi:10.3390/polym14051024), 2022-03-03
Supplement: s1 [file s1]

# Fabrication of Highly Photostable Polystyrene Films Embedded with Organometallic Complexes

Dina S. Ahmed <sup>1</sup>, Alaa Mohammed <sup>2</sup>, Amani A. Husain <sup>3</sup>, Gamal A. El-Hiti <sup>4,\*</sup>, Mohammed Kadhom <sup>5</sup>, Benson M. Kariuki <sup>6</sup> and Emad Yousif <sup>2</sup>

<sup>1</sup> Department of Medical Instrumentation Engineering, Al-Mansour University College, Baghdad 64021, Iraq; dina.saadi@muc.edu.iq

<sup>2</sup> Department of Chemistry, College of Science, Al-Nahrain University, Baghdad 64021, Iraq; alaaalqaycy7@gmail.com (A.M.); emad.yousif@ced.nahrainuniv.edu.iq (E.Y.)

<sup>3</sup> Polymer Research Unit, College of Science, Al-Mustansiriyah University, Baghdad 10052, Iraq; amani.eyad@uosamarra.edu.iq

<sup>4</sup> Department of Optometry, College of Applied Medical Sciences, King Saud University, Riyadh 11433, Saudi Arabia

<sup>5</sup> Department of Environmental Science, College of Renewable Energy and Environmental Science, Alkarkh University of Science, Baghdad 10081, Iraq; makbq6@mail.missouri.edu

<sup>6</sup> School of Chemistry, Cardiff University, Main Building, Park Place, Cardiff, CF10 3AT, UK; kari-ukib@cardiff.ac.uk

\* Correspondence: gelhiti@ksu.edu.sa; Tel.: +966-11469-3778; Fax: +966-11469-3536

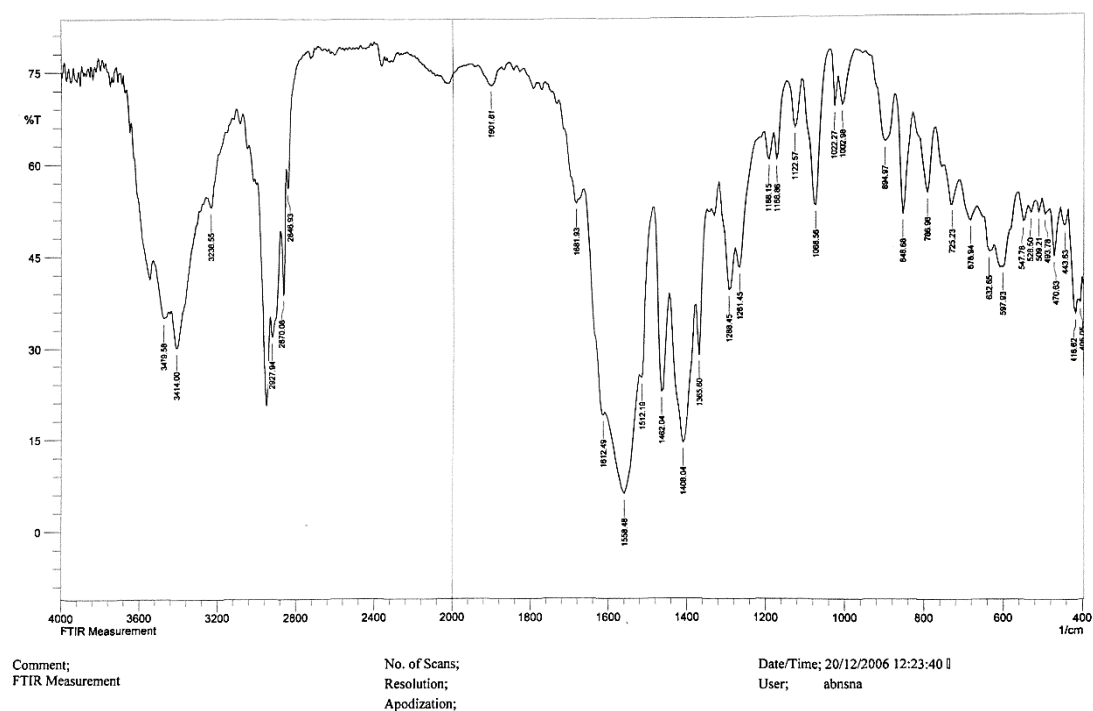

Figure S1. FTIR spectrum of ibuprofen-Mn complex.

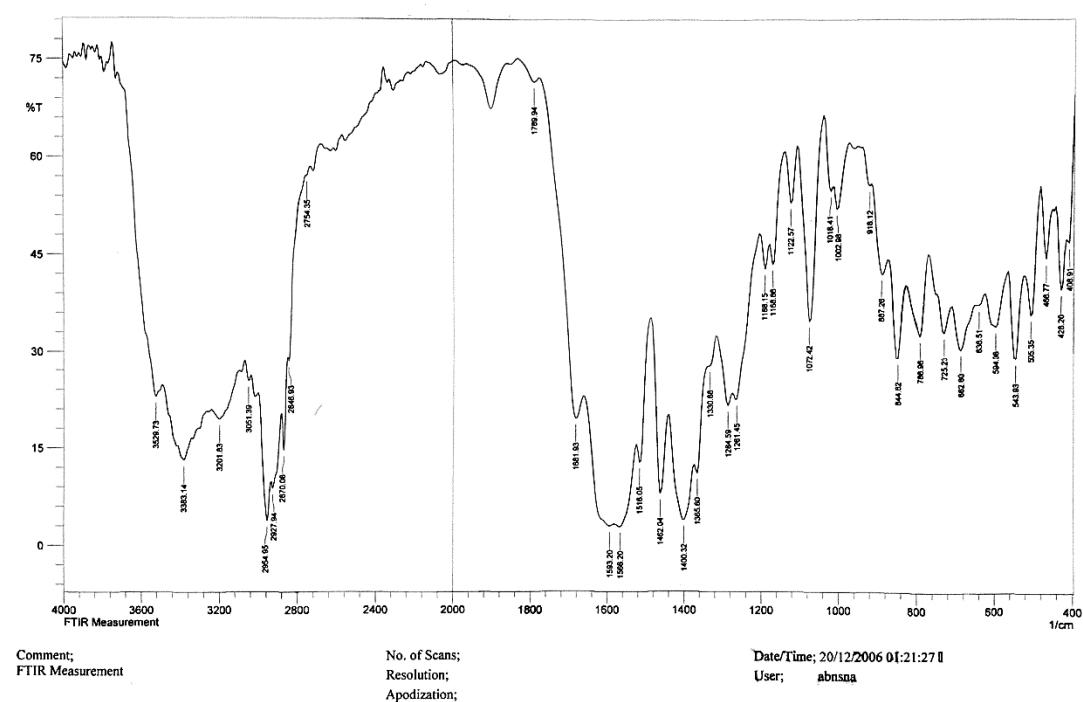

Figure S2. FTIR spectrum of ibuprofen-Co complex.

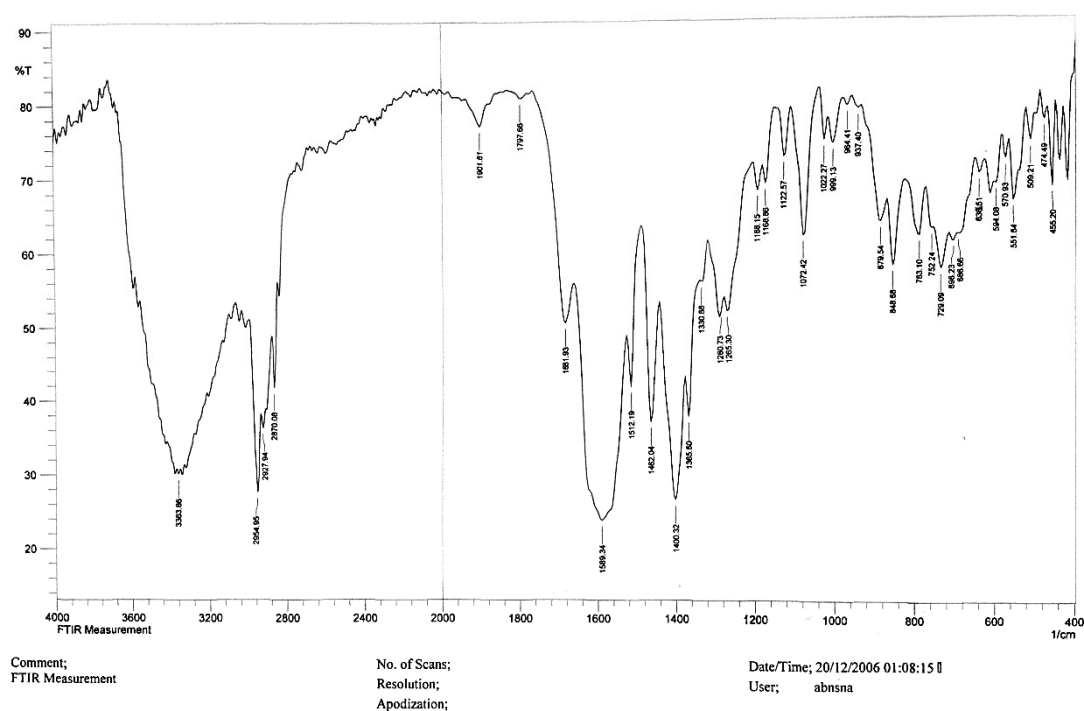

Figure S3. FTIR spectrum of ibuprofen-Ni complex.

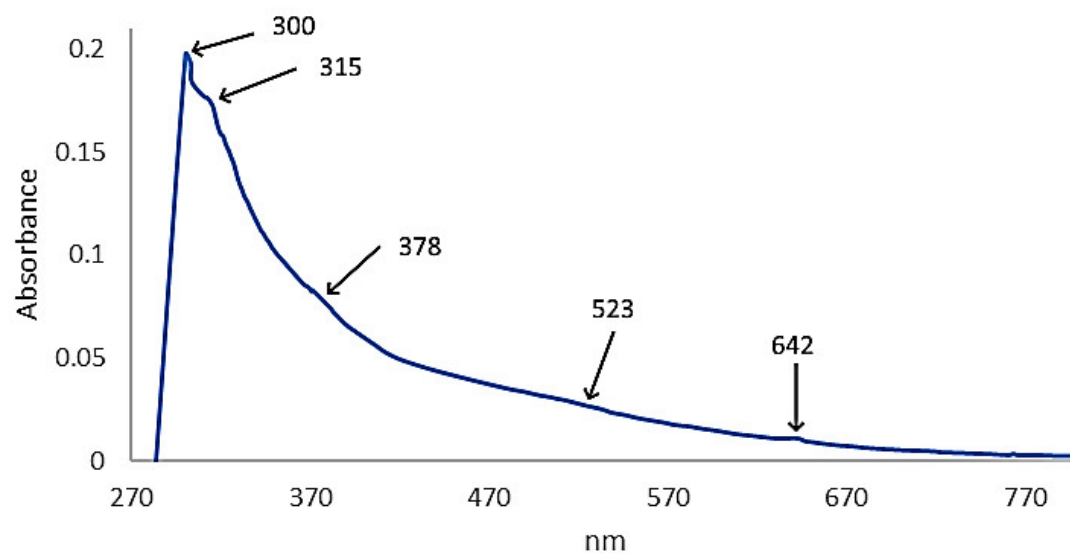

Figure S4. UV-visible spectrum of ibuprofen-Mn complex.

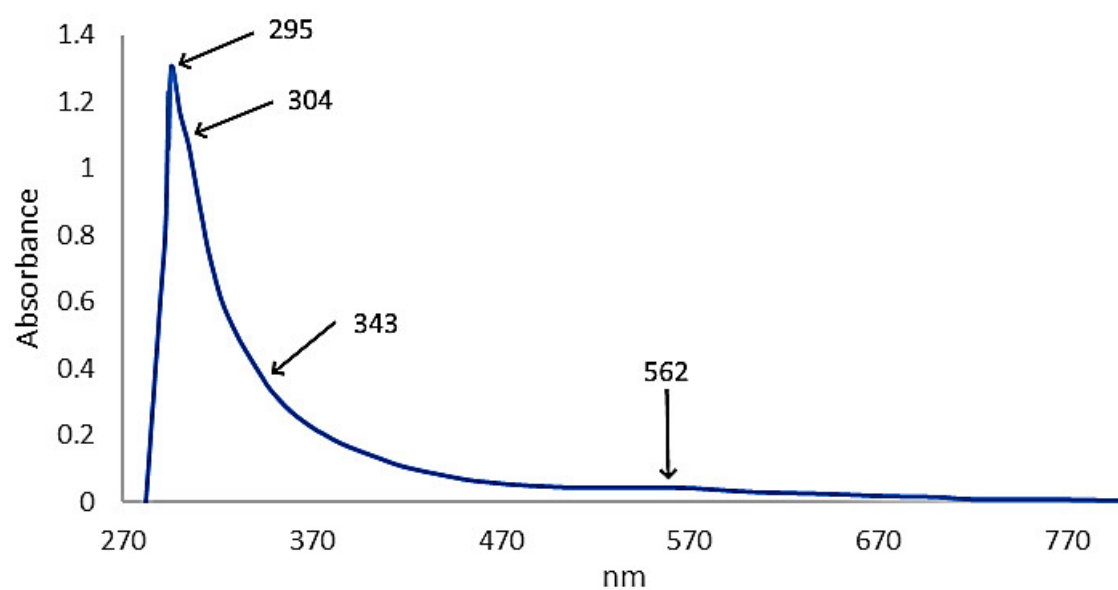

Figure S5. UV-visible spectrum of ibuprofen-Co complex.

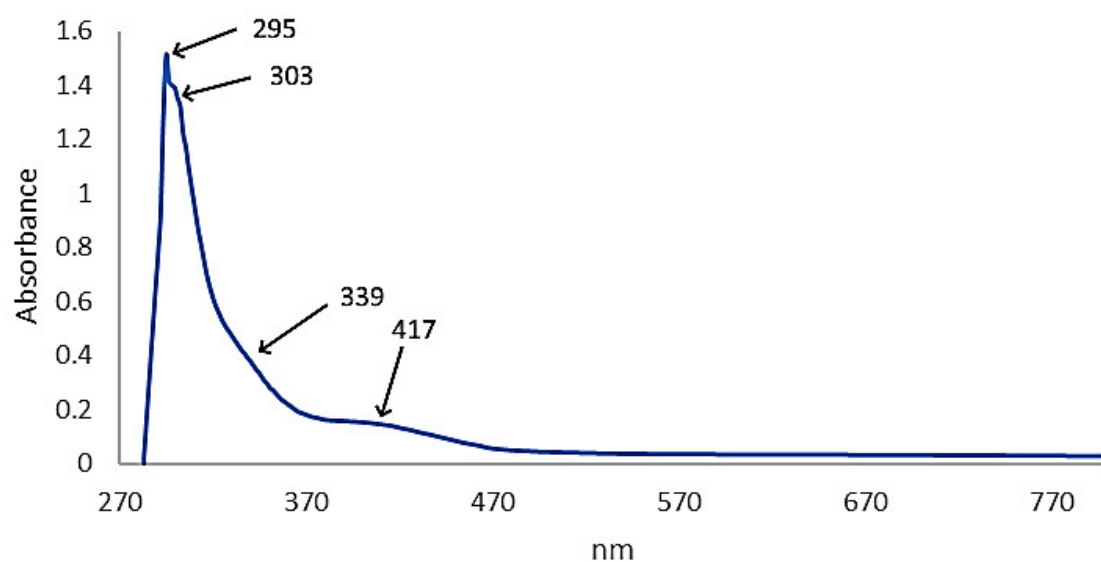

Figure S6. UV-visible spectrum of n ibuprofen-Ni complex.
